# Supplementary material
Source: publisher figshare collection journal article supplement (https://sage.figshare.com/ndownloader/files/21142632)
Supplement: Supplementary file [file 21142632]

## Supplementary Results Appendix

Appendix Table A1

*Test of Parallel Assumptions for Utilization and Expenditures in 2013: Arkansas Commercial Enrollees Not Enrolled through the Marketplace, 2013–2016*

| Study Outcome                                           | Weighted<br>N | Early<br>2014<br>PCMH<br>change in<br>slope<br>estimate<br>(SE) | Mid-2014<br>PCMH<br>change in<br>slope<br>estimate<br>(SE) | 2015<br>PCMH<br>change in<br>slope<br>estimate<br>(SE) |
|---------------------------------------------------------|---------------|-----------------------------------------------------------------|------------------------------------------------------------|--------------------------------------------------------|
| <b>Expenditures</b>                                     |               |                                                                 |                                                            |                                                        |
| Total expenditures                                      | 121,516       | -0.2<br>(9.638)                                                 | -1.4<br>(12.178)                                           | 97.3***<br>(35.384)                                    |
| Professional expenditures                               | 121,516       | 0.9<br>(3.625)                                                  | 4.3<br>(3.452)                                             | 9.2*<br>(4.997)                                        |
| Pharmaceutical expenditures                             | 121,516       | -1.1<br>(1.880)                                                 | -1.5<br>(2.021)                                            | 6.1<br>(6.557)                                         |
| Inpatient facility expenditures                         | 121,516       | 2.1<br>(4.800)                                                  | 4.9<br>(7.095)                                             | 76.8**<br>(37.359)                                     |
| Outpatient facility expenditures                        | 121,516       | -2.1<br>(3.717)                                                 | -9.0<br>(8.927)                                            | 5.2<br>(6.302)                                         |
| <b>Service utilization</b>                              |               |                                                                 |                                                            |                                                        |
| Inpatient admissions per 1,000 enrollee quarters        | 115,597       | -0.3<br>(0.001)                                                 | 0.5<br>(0.001)                                             | 2.7**<br>(0.001)                                       |
| Primary care visits per 100 enrollee quarters           | 121,516       | 0.6<br>(0.005)                                                  | 0.8<br>(0.006)                                             | 0.5<br>(0.008)                                         |
| Specialist visits per 100 enrollee quarters             | 121,488       | 0.1<br>(0.003)                                                  | -0.2<br>(0.003)                                            | 0.3<br>(0.004)                                         |
| Emergency department visits per 1,000 enrollee quarters | 121,404       | -1.9<br>(0.002)                                                 | 0.4<br>(0.002)                                             | -3.1<br>(0.002)                                        |

PCMH = patient-centered medical home.

Notes: Comparative interrupted time series regression models were estimated using ordinary least squares for the expenditure outcomes and maximum likelihood logit for the service use outcomes. The change in slope estimates represents the difference in the linear trend relative to the 2016 PCMH group. Standard statistical practice is to use confidence intervals of 90% or higher.

Source: Arkansas All-Payer Claims Database, 2013.

Appendix Table A2

*Weighted Annual Sample Characteristics by Marketplace Status, 2013–2016*

| Characteristic                    | Non-Marketplace population annualized by PCMH status |               | Non-Marketplace population annualized by calendar year |          |          |          | Marketplace-only population annualized by calendar year |          |          |
|-----------------------------------|------------------------------------------------------|---------------|--------------------------------------------------------|----------|----------|----------|---------------------------------------------------------|----------|----------|
|                                   | Pre-PCMH [1]                                         | Post-PCMH [2] | 2013 [3]                                               | 2014 [4] | 2015 [5] | 2016 [6] | 2014 [7]                                                | 2015 [8] | 2016 [9] |
| Total expenditures                | \$3,353                                              | \$3,881       | \$3,427                                                | \$3,612  | \$3,904  | \$4,328  | \$7,330                                                 | \$8,523  | \$8,944  |
| Professional expenditures         | \$1,349                                              | \$1,483       | \$1,400                                                | \$1,459  | \$1,487  | \$1,575  | \$2,732                                                 | \$2,868  | \$2,883  |
| Prescription expenditures         | \$805                                                | \$1,046       | \$835                                                  | \$880    | \$1,064  | \$1,204  | \$1,230                                                 | \$1,591  | \$1,746  |
| Inpatient facility expenditures   | \$466                                                | \$488         | \$459                                                  | \$448    | \$503    | \$576    | \$1,617                                                 | \$1,917  | \$2,033  |
| Other facility expenditures       | \$734                                                | \$864         | \$734                                                  | \$826    | \$849    | \$973    | \$1,752                                                 | \$2,147  | \$2,282  |
| Any inpatient admission, %        | 3.0                                                  | 3.4           | 3.1                                                    | 3.0      | 3.5      | 3.9      | 10.7                                                    | 12.8     | 12.6     |
| Any specialist visit, %           | 42.3                                                 | 46.3          | 43.0                                                   | 44.6     | 46.9     | 48.4     | 49.3                                                    | 52.1     | 53.3     |
| Any ED visit, %                   | 20.4                                                 | 22.0          | 20.7                                                   | 21.4     | 22.6     | 23.4     | 43.9                                                    | 45.1     | 44.4     |
| Age                               | 29.6                                                 | 30.9          | 28.0                                                   | 29.7     | 31.5     | 32.3     | 38.9                                                    | 39.3     | 39.8     |
| Female, %                         | 55.5                                                 | 55.6          | 55.2                                                   | 55.7     | 55.5     | 55.9     | 70.4                                                    | 67.5     | 67.4     |
| BH diagnosis, %                   | 17.9                                                 | 18.3          | 18.5                                                   | 18.4     | 18.8     | 18.4     | 29.9                                                    | 31.5     | 32.9     |
| Lives in MSA, %                   | 55.3                                                 | 57.1          | 57.2                                                   | 53.6     | 58.0     | 56.7     | 48.4                                                    | 44.6     | 42.7     |
| Has prescription drug coverage, % | 83.8                                                 | 82.6          | 83.9                                                   | 83.7     | 81.5     | 82.8     | 100.0                                                   | 100.0    | 100.0    |
| Insurance product type            |                                                      |               |                                                        |          |          |          |                                                         |          |          |
| Other commercial insurance, %     | 14.3                                                 | 11.2          | 14.2                                                   | 14.5     | 9.8      | 10.2     | 20.9                                                    | 30.3     | 34.7     |
| PPO, %                            | 48.3                                                 | 51.7          | 49.8                                                   | 51.3     | 51.8     | 50.3     | 79.1                                                    | 69.7     | 65.3     |
| PoS, %                            | 27.5                                                 | 25.1          | 27.2                                                   | 25.1     | 25.8     | 25.0     | 0.0                                                     | 0.0      | 0.0      |
| Insurance market type             |                                                      |               |                                                        |          |          |          |                                                         |          |          |
| Individual market plan, %         | 28.9                                                 | 30.7          | 27.8                                                   | 28.6     | 31.8     | 31.8     | 100.0                                                   | 100.0    | 100.0    |
| Large employer plan, %            | 42.1                                                 | 42.9          | 42.7                                                   | 41.8     | 43.0     | 43.4     | 0.0                                                     | 0.0      | 0.0      |
| Small employer plan, %            | 11.6                                                 | 11.7          | 11.8                                                   | 11.7     | 11.8     | 11.3     | 0.0                                                     | 0.0      | 0.0      |
| Unweighted N                      | 42,732                                               | 77,567        | 30,989                                                 | 30,176   | 28,272   | 27,453   | 15,945                                                  | 23,484   | 25,047   |
| Weighted N                        | 44,261                                               | 80,102        | 32,107                                                 | 31,102   | 29,121   | 28,480   | 17,744                                                  | 24,957   | 26,548   |

BH = behavioral health; ED = emergency department; MSA = metropolitan statistical area; PCMH = patient-centered medical

home; PPO = preferred provider organization; PoS = point of service.

Source: Arkansas All-Payer Claims Database, 2013–2016.

Appendix Table A3

*Estimated Spillover Effects of Medicaid PCMH Adoption on PMPM Expenditures and Quarterly Rates of Utilization for the non-Marketplace sample, 2013–2016*

| Study outcome                                           | Weighted<br>N | Model 1: Spillover effects across all PCMH practices |                  |                         | Model 2: Spillover effects for early 2014 PCMH practices |                    |                         |
|---------------------------------------------------------|---------------|------------------------------------------------------|------------------|-------------------------|----------------------------------------------------------|--------------------|-------------------------|
|                                                         |               | 2013 Adjusted mean                                   | DD estimate (SE) | Relative difference (%) | 2013 Adjusted mean, CG practice                          | DD estimate (SE)   | Relative difference (%) |
| Expenditures                                            |               |                                                      |                  |                         |                                                          |                    |                         |
| Total expenditures                                      | 458,622       | 292.8                                                | 6.5<br>(12.213)  | 2.2                     | 344.8                                                    | 37.9*<br>(20.195)  | 13.8                    |
| Professional expenditures                               | 458,622       | 119.4                                                | 2.4<br>(3.518)   | 2.0                     | 133.0                                                    | 16.6***<br>(5.179) | 14.5                    |
| Pharmaceutical expenditures                             | 458,622       | 71.1                                                 | 3.0<br>(3.699)   | 4.2                     | 77.6                                                     | 2.9<br>(7.829)     | 4.2                     |
| Inpatient facility expenditures                         | 458,622       | 39.9                                                 | -1.2<br>(6.906)  | -3.0                    | 58.9                                                     | 13.7<br>(14.438)   | 41.0                    |
| Outpatient facility expenditures                        | 458,622       | 62.4                                                 | 2.3<br>(5.409)   | 3.7                     | 75.3                                                     | 4.7<br>(7.184)     | 8.1                     |
| Service utilization                                     |               |                                                      |                  |                         |                                                          |                    |                         |
| Inpatient admissions per 1,000 enrollee quarters        | 453,099       | 9.1                                                  | 0.6<br>(0.001)   | 6.2                     | 11.7                                                     | 0.0<br>(0.001)     | 0.6                     |
| Primary care visits per 100 enrollee quarters           | 458,622       | 70.5                                                 | 0.2<br>(0.004)   | 0.3                     | 71.8                                                     | 0.7<br>(0.004)     | 0.9                     |
| Specialist visits per 100 enrollee quarters             | 458,594       | 18.6                                                 | -0.2<br>(0.004)  | -1.1                    | 19.6                                                     | 0.6<br>(0.004)     | 3.4                     |
| Emergency department visits per 1,000 enrollee quarters | 458,575       | 67.0                                                 | 1.8<br>(0.002)   | 2.7                     | 71.6                                                     | 1.8<br>(0.003)     | 2.7                     |

DD = difference-in-differences; PCMH = patient-centered medical home; PMPM = per member per month; SE= standard error; CG = comparison group.

\* p<0.1, \*\* p<0.05, \*\*\* p<0.01.

Notes: DD models were estimated using ordinary least squares for expenditure outcomes and maximum likelihood logits for service utilization outcomes. The relative difference is the DD estimate expressed as a percentage of the 2013 adjusted mean.

Source: Arkansas All-Payer Claims Database, 2013–2016

Appendix Table A4

*Estimated Spillover Effects of Medicaid PCMH Adoption on PMPM Expenditures and Quarterly Rates of Utilization using comparative interrupted time series for Model 1*  
*(Effect across all PCMH practices), 2013–2016*

| Study outcome                                           | Weighted N | 2013 Adjusted mean | DD estimate (SE)    | Relative difference (%) | Change in slope estimate (SE) |
|---------------------------------------------------------|------------|--------------------|---------------------|-------------------------|-------------------------------|
| <b>Expenditures</b>                                     |            |                    |                     |                         |                               |
| Total expenditures                                      | 704,419    | 289.2              | -49.5**<br>(21.028) | -17.1                   | 6.0*<br>(3.4476)              |
| Professional expenditures                               | 704,419    | 120.1              | -1.1<br>(5.503)     | -0.9                    | 0.1<br>(0.8621)               |
| Pharmaceutical expenditures                             | 704,419    | 70.0               | -7.7<br>(7.183)     | -11.0                   | 1.6<br>(1.1031)               |
| Inpatient facility expenditures                         | 704,419    | 38.2               | -25.9**<br>(10.124) | -67.7                   | 2.4<br>(1.7548)               |
| Outpatient facility expenditures                        | 704,419    | 61.0               | -14.8<br>(9.003)    | -24.3                   | 1.9<br>(1.5581)               |
| <b>Service utilization</b>                              |            |                    |                     |                         |                               |
| Inpatient admissions per 1,000 enrollee quarters        | 701,897    | 8.6                | 0.3<br>(0.001)      | 3.3                     | 0.1<br>(0.0001)               |
| Primary care visits per 100 enrollee quarters           | 704,416    | 70.5               | 0.9*<br>(0.005)     | 1.3                     | 0.1<br>(0.0007)               |
| Specialist visits per 100 enrollee quarters             | 704,384    | 18.4               | -0.2<br>(0.005)     | -0.9                    | 0.1<br>(0.0009)               |
| Emergency department visits per 1,000 enrollee quarters | 704,373    | 66.4               | 3.3<br>(0.002)      | 5.0                     | -0.2<br>(0.0004)              |

DD = difference-in-differences; PCMH = patient-centered medical home; PMPM = per member per month; SE= standard error.

\* p<0.1, \*\* p<0.05, \*\*\* p<0.01.

Notes: A comparative interrupted time series model was estimated using ordinary least squares for expenditure outcomes and maximum likelihood logits for service utilization outcomes. The relative difference is the DD estimate expressed as a percentage of the 2013 adjusted mean.

Source: Arkansas All-Payer Claims Database, 2013–2016.

Appendix Table A5

*Estimated Spillover Effects of Medicaid PCMH Adoption on PMPM Expenditures and Quarterly Rates of Utilization using comparative interrupted time series for Model 2*

*(Effect for early 2014 practices), 2013–2016*

| Study outcome                                           | Weighted N | 2013<br>Adjusted<br>mean, CG<br>practices | DD estimate<br>(SE) | Relative<br>difference (%) | Change in<br>slope<br>estimate<br>(SE) |
|---------------------------------------------------------|------------|-------------------------------------------|---------------------|----------------------------|----------------------------------------|
| Expenditures                                            |            |                                           |                     |                            |                                        |
| Total expenditures                                      | 704,419    | 325.9                                     | -3.0<br>(41.480)    | -1.1                       | 7.3<br>(5.418)                         |
| Professional expenditures                               | 704,419    | 131.9                                     | 8.7<br>(7.518)      | 7.6                        | 0.3<br>(1.847)                         |
| Pharmaceutical expenditures                             | 704,419    | 73.4                                      | -20.9<br>(16.691)   | -30.4                      | 5.6***<br>(2.032)                      |
| Inpatient facility expenditures                         | 704,419    | 50.5                                      | -0.1<br>(24.496)    | -0.1                       | 2.3<br>(3.699)                         |
| Outpatient facility expenditures                        | 704,419    | 70.0                                      | 9.2<br>(9.401)      | 15.9                       | -1.0<br>(2.287)                        |
| Service utilization                                     |            |                                           |                     |                            |                                        |
| Inpatient admissions per 1,000 enrollee quarters        | 701,897    | 9.8                                       | 7.0***<br>(0.002)   | 85.6                       | 1.3***<br>(0.000)                      |
| Primary care visits per 100 enrollee quarters           | 704,416    | 71.4                                      | 7.1***<br>(0.014)   | 10.1                       | 1.3***<br>(0.002)                      |
| Specialist visits per 100 enrollee quarters             | 704,384    | 18.9                                      | -0.7<br>(0.012)     | -3.6                       | -0.1<br>(0.002)                        |
| Emergency department visits per 1,000 enrollee quarters | 704,373    | 68.9                                      | 10.7<br>(0.009)     | 16.4                       | 2.4*<br>(0.001)                        |

DD = difference-in-differences; PCMH = patient-centered medical home; PMPM = per member per month; SE= standard error.

\* p<0.1, \*\* p<0.05, \*\*\* p<0.01.

Notes: A comparative interrupted time series model was estimated using ordinary least squares for expenditure outcomes and maximum likelihood logits for service utilization outcomes. The relative difference is the early 2014 DD estimate expressed as a percentage of the 2013 adjusted comparison group mean.

Source: Arkansas All-Payer Claims Database, 2013–2016.



Appendix Table A6

Weighted Annual Sample Characteristics for the **sample attributed with a one-visit floor, 2013–2016**

| Sample characteristic             | Annualized by PCMH status |                  | Annualized by calendar year |             |             |             | Annualized by PCMH group in the baseline period (2013) |                                     |                              |                               |
|-----------------------------------|---------------------------|------------------|-----------------------------|-------------|-------------|-------------|--------------------------------------------------------|-------------------------------------|------------------------------|-------------------------------|
|                                   | Pre-PCMH<br>[1]           | Post-PCMH<br>[2] | 2013<br>[3]                 | 2014<br>[4] | 2015<br>[5] | 2016<br>[6] | Early 2014<br>PCMH<br>adopters<br>[7]                  | Mid-2014<br>PCMH<br>adopters<br>[8] | 2015 PCMH<br>adopters<br>[9] | 2016 PCMH<br>adopters<br>[10] |
| Total expenditures                | \$2,408                   | \$3,647          | \$1,982                     | \$3,051     | \$3,833     | \$4,227     | \$1,891                                                | \$2,488                             | \$2,483                      | \$3,459                       |
| Professional expenditures         | \$948                     | \$1,303          | \$829                       | \$1,197     | \$1,359     | \$1,433     | \$803                                                  | \$952                               | \$946                        | \$1,369                       |
| Prescription expenditures         | \$533                     | \$794            | \$498                       | \$622       | \$829       | \$930       | \$481                                                  | \$589                               | \$639                        | \$698                         |
| Inpatient facility expenditures   | \$397                     | \$693            | \$246                       | \$538       | \$747       | \$846       | \$222                                                  | \$379                               | \$410                        | \$576                         |
| Other facility expenditures       | \$531                     | \$857            | \$410                       | \$693       | \$898       | \$1,018     | \$384                                                  | \$568                               | \$489                        | \$816                         |
| Any inpatient admission, %        | 2.9                       | 5.0              | 2.0                         | 3.9         | 5.5         | 5.8         | 1.8                                                    | 2.7                                 | 2.7                          | 4.6                           |
| Any specialist visit, %           | 27.6                      | 32.8             | 27.3                        | 30.7        | 33.5        | 34.8        | 27.1                                                   | 32.8                                | 25.5                         | 28.1                          |
| Any ED visit, %                   | 17.1                      | 23.4             | 14.2                        | 21.6        | 24.7        | 25.4        | 14.0                                                   | 14.4                                | 16.8                         | 26.0                          |
| Age                               | 30.1                      | 32.5             | 27.1                        | 31.1        | 33.2        | 33.8        | 25.8                                                   | 32.4                                | 33.2                         | 35.9                          |
| Female, %                         | 53.7                      | 56.1             | 51.6                        | 55.8        | 56.1        | 56.7        | 51.3                                                   | 52.9                                | 55.7                         | 60.7                          |
| BH diagnosis, %                   | 13.2                      | 16.4             | 12.1                        | 15.2        | 17.0        | 17.8        | 12.0                                                   | 10.9                                | 14.2                         | 18.9                          |
| Lives in MSA, %                   | 53.3                      | 53.1             | 56.8                        | 52.5        | 52.8        | 50.9        | 59.1                                                   | 56.7                                | 34.2                         | 33.0                          |
| Has prescription drug coverage, % | 86.7                      | 88.9             | 84.2                        | 88.8        | 88.6        | 89.8        | 83.6                                                   | 86.5                                | 90.0                         | 94.4                          |
| Marketplace plan, %               | 15.9                      | 19.0             | 14.5                        | 17.0        | 18.7        | 21.4        | 13.4                                                   | 15.5                                | 16.2                         | 16.1                          |
| Insurance product type            |                           |                  |                             |             |             |             |                                                        |                                     |                              |                               |
| Other commercial insurance, %     | 15.9                      | 19.0             | 14.5                        | 17.0        | 18.7        | 21.4        | 13.4                                                   | 15.5                                | 16.2                         | 16.1                          |
| Insurance type—PPO, %             | 54.9                      | 58.8             | 51.9                        | 60.3        | 59.2        | 57.0        | 54.0                                                   | 45.5                                | 48.2                         | 63.5                          |
| Insurance type—PoS, %             | 23.2                      | 16.2             | 27.3                        | 17.9        | 16.1        | 14.7        | 26.5                                                   | 31.1                                | 27.7                         | 15.1                          |
| Insurance market type             |                           |                  |                             |             |             |             |                                                        |                                     |                              |                               |
| Individual market plan, %         | 40.1                      | 55.4             | 28.0                        | 49.3        | 58.1        | 59.8        | 27.3                                                   | 33.8                                | 31.4                         | 60.5                          |
| Large employer plan, %            | 35.2                      | 27.3             | 42.4                        | 29.4        | 26.2        | 25.2        | 43.3                                                   | 39.1                                | 40.6                         | 23.1                          |
| Small employer plan, %            | 9.8                       | 7.6              | 11.7                        | 8.2         | 7.4         | 6.7         | 11.7                                                   | 12.3                                | 12.4                         | 7.1                           |
| Unweighted N                      | 116,256                   | 270,034          | 72,434                      | 97,178      | 102,940     | 101,921     | 54,425                                                 | 7,324                               | 2,984                        | 5,444                         |
| Weighted N                        | 123,057                   | 284,626          | 75,497                      | 103,082     | 108,349     | 107,681     | 56,737                                                 | 7,612                               | 3,126                        | 5,857                         |

BH = behavioral health; ED = emergency department; MSA = metropolitan statistical area; PCMH = patient-centered medical home; PoS = point of service; PPO = preferred provider organization.

Notes: Numbers in brackets refer to the column numbers. Column numbers are referenced in the text discussing this exhibit.

Source: Arkansas All-Payer Claims Database, 2013.

Appendix Table A7

*Estimated Spillover Effects of Medicaid PCMH Adoption on PMPM Expenditures and Quarterly Rates of Utilization using a sample attributed with a one-visit floor, 2013–2016*

| Study outcome                                           | Weighted<br>N | Model 1: Spillover effects across all<br>PCMH practices |                        |                               | Model 2: Spillover effects for early 2014<br>PCMH practices |                        |                               |
|---------------------------------------------------------|---------------|---------------------------------------------------------|------------------------|-------------------------------|-------------------------------------------------------------|------------------------|-------------------------------|
|                                                         |               | 2013<br>Adjusted<br>mean                                | DD<br>estimate<br>(SE) | Relative<br>difference<br>(%) | 2013<br>Adjusted<br>mean, CG<br>practice                    | DD<br>estimate<br>(SE) | Relative<br>difference<br>(%) |
| Expenditures                                            |               |                                                         |                        |                               |                                                             |                        |                               |
| Total expenditures                                      | 1,440,629     | 171.4                                                   | -0.1                   | -0.1                          | 196.7                                                       | 1.3                    | 0.8                           |
|                                                         |               |                                                         | (7.734)                |                               |                                                             | (15.055)               |                               |
| Professional expenditures                               | 1,440,629     | 71.7                                                    | -1.3                   | -1.9                          | 78.4                                                        | 6.5*                   | 9.3                           |
|                                                         |               |                                                         | (2.389)                |                               |                                                             | (3.776)                |                               |
| Pharmaceutical expenditures                             | 1,440,629     | 42.9                                                    | 3.2                    | 7.4                           | 47.3                                                        | -1.6                   | -3.8                          |
|                                                         |               |                                                         | (2.313)                |                               |                                                             | (4.321)                |                               |
| Inpatient facility expenditures                         | 1,440,629     | 21.5                                                    | -2.9                   | -13.3                         | 29.7                                                        | 2.5                    | 13.4                          |
|                                                         |               |                                                         | (4.709)                |                               |                                                             | (6.887)                |                               |
| Outpatient facility expenditures                        | 1,440,629     | 35.3                                                    | 0.9                    | 2.6                           | 41.3                                                        | -6.2                   | -18.5                         |
|                                                         |               |                                                         | (3.643)                |                               |                                                             | (6.335)                |                               |
| Service utilization                                     |               |                                                         |                        |                               |                                                             |                        |                               |
| Inpatient admissions per 1,000 enrollee quarters        | 1,440,629     | 5.6                                                     | 0.1                    | 1.6                           | 6.8                                                         | -0.4                   | -7.0                          |
|                                                         |               |                                                         | (0.0005)               |                               |                                                             | (0.001)                |                               |
| Primary care visits per 100 enrollee quarters           | 1,440,629     | 50.5                                                    | 0.3                    | 0.6                           | 51.4                                                        | 0.1                    | 0.1                           |
|                                                         |               |                                                         | (0.003)                |                               |                                                             | (0.007)                |                               |
| Specialist visits per 100 enrollee quarters             | 1,440,629     | 10.7                                                    | -0.3                   | -2.8                          | 11.2                                                        | 0.0                    | -0.3                          |
|                                                         |               |                                                         | (0.003)                |                               |                                                             | (0.004)                |                               |
| Emergency department visits per 1,000 enrollee quarters | 1,440,629     | 44.3                                                    | 1.2                    | 2.7                           | 47.1                                                        | 2.2                    | 5.1                           |
|                                                         |               |                                                         | (0.002)                |                               |                                                             | (0.003)                |                               |

DD = difference-in-differences; PCMH = patient-centered medical home; PMPM = per member per month; SE= standard error; CG = comparison group.

\* p<0.1, \*\* p<0.05, \*\*\* p<0.01.

Notes: DD models were estimated using ordinary least squares for expenditure outcomes and maximum likelihood logits for service utilization outcomes. The relative difference is the DD estimate expressed as a percentage of the 2013 adjusted mean.

Source: Arkansas All-Payer Claims Database, 2013–2016

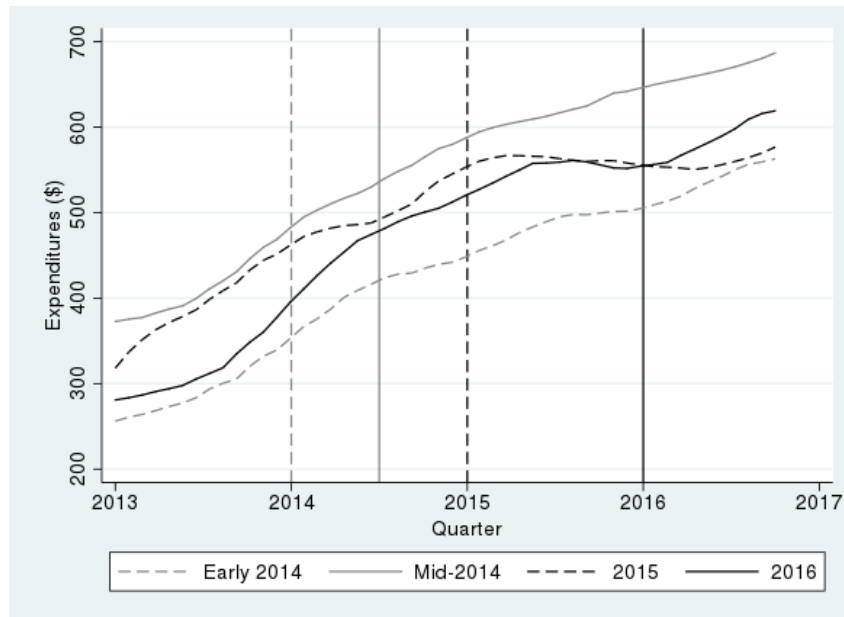

Appendix Figure A1. Unadjusted quarterly total expenditures by PCMH group (2013–2016). Source: Arkansas All-Payer Claims Database, 2013–2016.

PCMH = patient-centered medical home.

Note: Quarterly trends were smoothed using local polynomial regression with an Epanechnikov kernel.

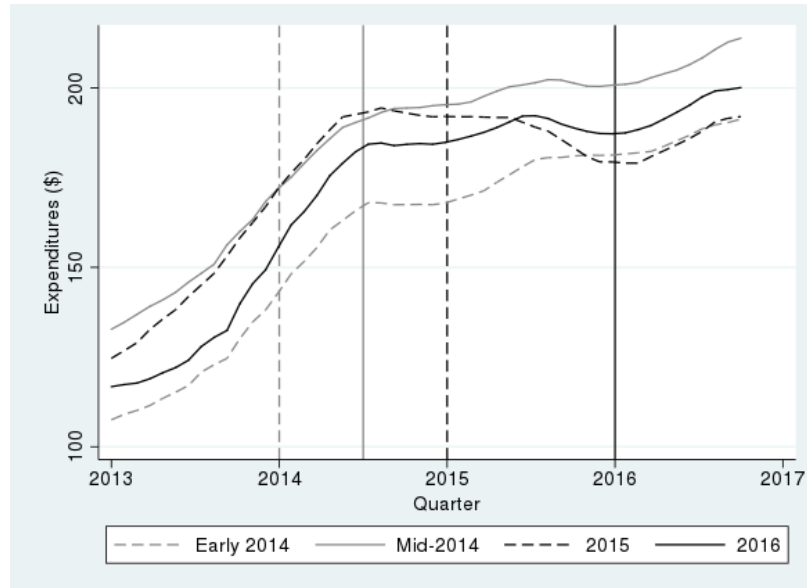

Appendix Figure A2. Unadjusted quarterly professional expenditures by PCMH group (2013–2016). Source: Arkansas All-Payer Claims Database, 2013–2016.

PCMH = patient-centered medical home.

Note: Quarterly trends were smoothed using local polynomial regression with an Epanechnikov kernel.

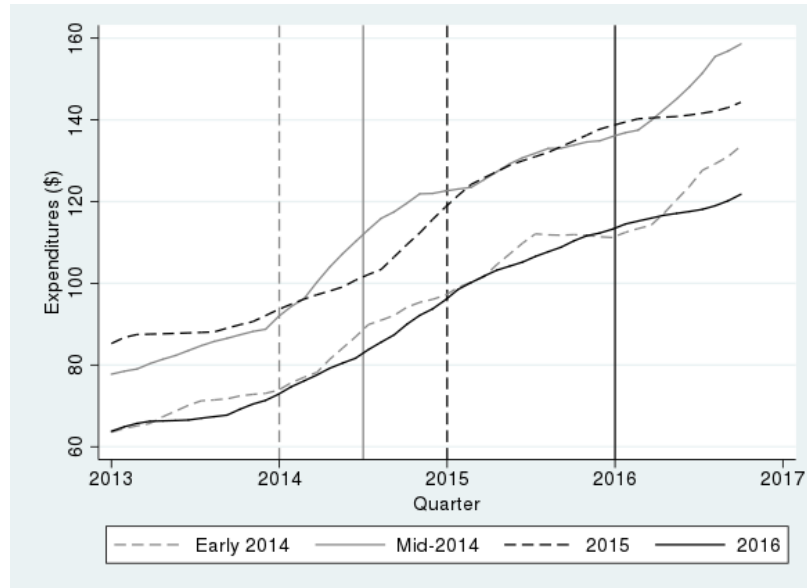

Appendix Figure A3. Unadjusted quarterly prescription drug expenditures by PCMH group (2013–2016). Source: Arkansas All-Payer Claims Database, 2013–2016.

PCMH = patient-centered medical home.

Note: Quarterly trends were smoothed using local polynomial regression with an Epanechnikov kernel.

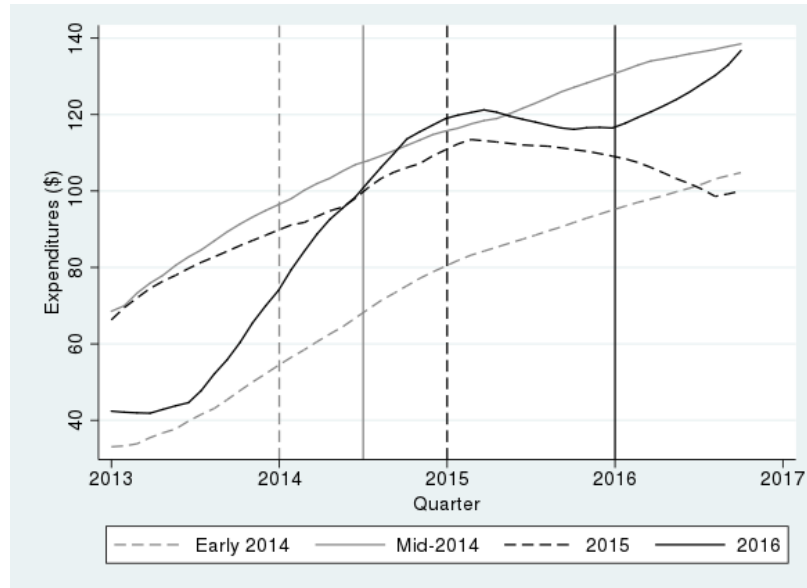

Appendix Figure A4. Unadjusted quarterly inpatient facility expenditures by PCMH group (2013–2016). Source: Arkansas All-Payer Claims Database, 2013–2016.

PCMH = patient-centered medical home.

Note: Quarterly trends were smoothed using local polynomial regression with an Epanechnikov kernel.

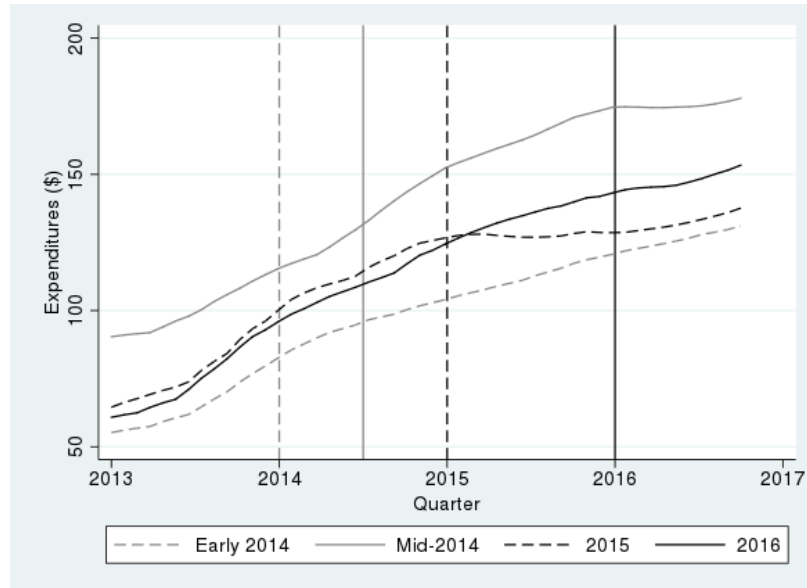

Appendix Figure A5. Unadjusted quarterly non-inpatient facility expenditures by PCMH group (2013–2016). Source: Arkansas All-Payer Claims Database, 2013–2016.  
 PCMH = patient-centered medical home.  
 Note: Quarterly trends were smoothed using local polynomial regression with an Epanechnikov kernel.



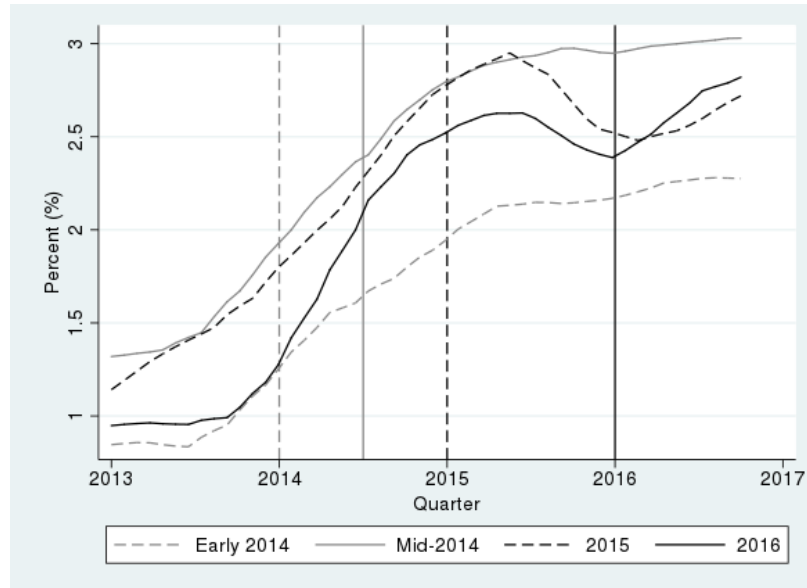

Appendix Figure A6. Unadjusted quarterly proportion with an inpatient admission, by PCMH group (2013–2016). Source: Arkansas All-Payer Claims Database, 2013–2016.  
 PCMH = patient-centered medical home.  
 Note: Quarterly trends were smoothed using local polynomial regression with an Epanechnikov kernel.

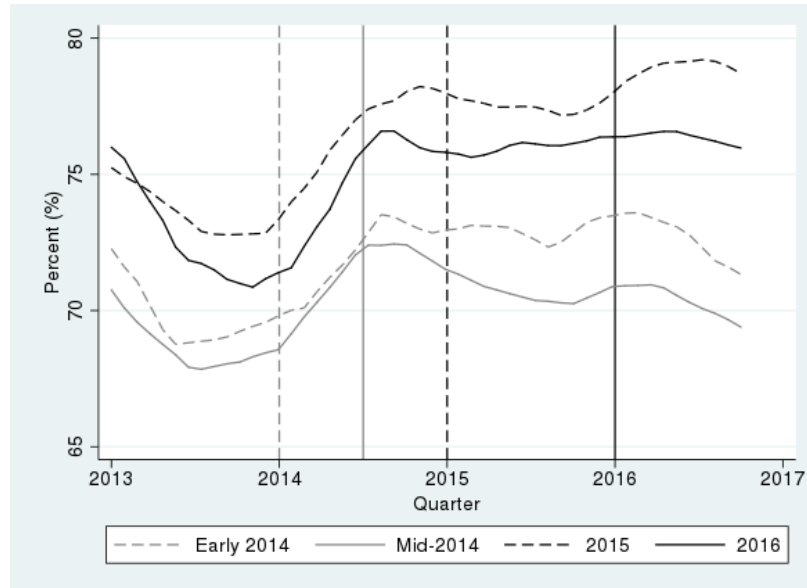

Appendix Figure A7. Unadjusted quarterly proportion with a primary care visit, by PCMH group (2013–2016). Source: Arkansas All-Payer Claims Database, 2013–2016.  
 PCMH = patient-centered medical home.  
 Note: Quarterly trends were smoothed using local polynomial regression with an Epanechnikov kernel.

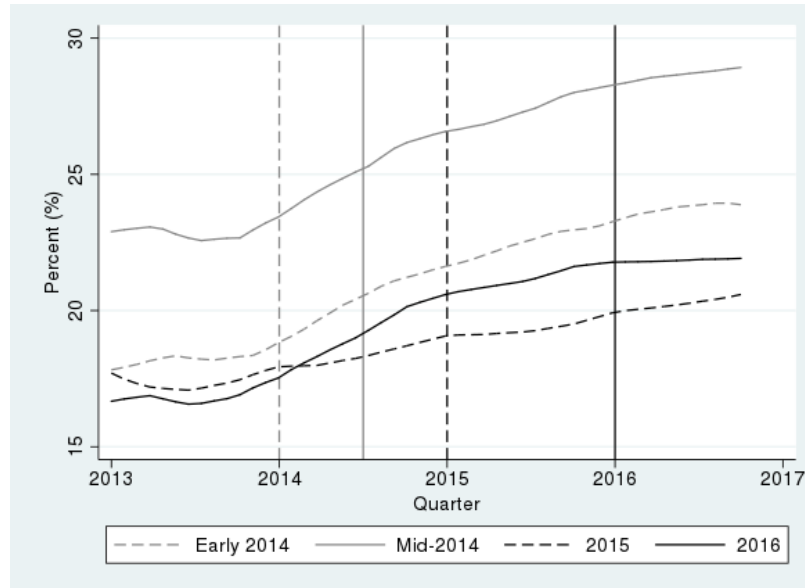

Appendix Figure A8. Unadjusted quarterly proportion with a specialist visit, by PCMH group (2013–2016). Source: Arkansas All-Payer Claims Database, 2013–2016.

PCMH = patient-centered medical home.

Note: Quarterly trends were smoothed using local polynomial regression with an Epanechnikov kernel.

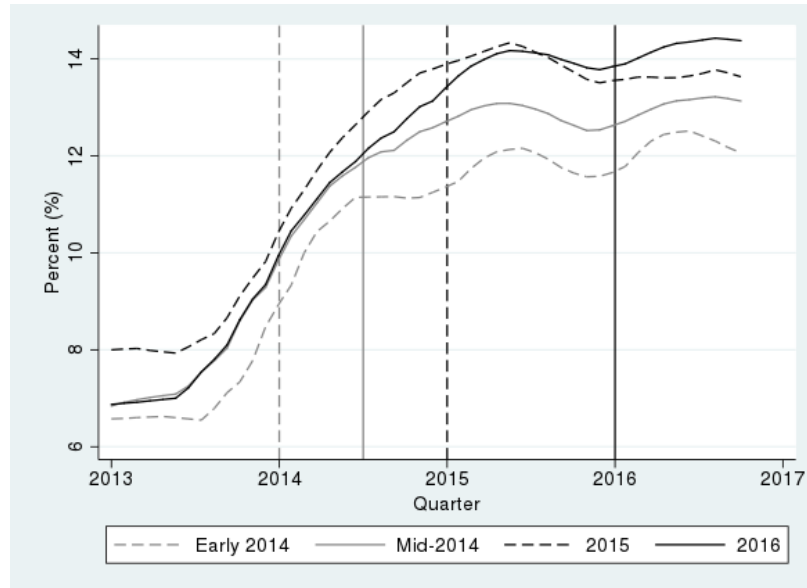

Appendix Figure A9. Unadjusted quarterly proportion with an emergency department visit, by PCMH group (2013–2016). Source: Arkansas All-Payer Claims Database, 2013–2016.  
PCMH = patient-centered medical home.  
Note: Quarterly trends were smoothed using local polynomial regression with an Epanechnikov kernel.
